# Supplementary material for: CdSe–CdS quantum dots co-sensitized ZnO hierarchical hybrids for solar cells with enhanced photo-electrical conversion efficiency
Source: Royal Society of Chemistry journal article supplement (doi:10.1039/c4nr04262j), 2014-01-01
Supplement: c4nr04262j1.pdf [file c4nr04262j1.pdf]

*Supporting Information*

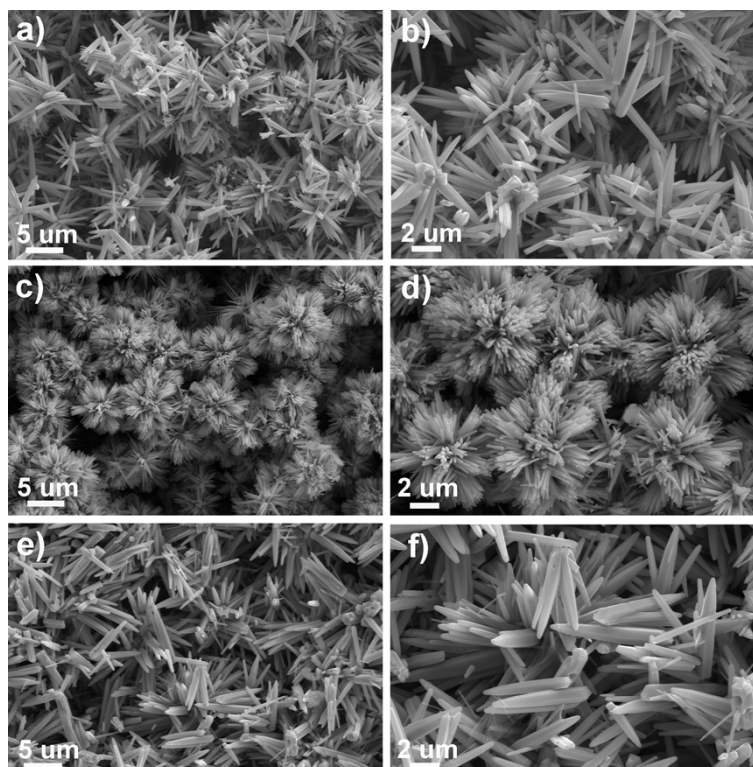

Fig. S1 Typical SEM images of ZnO prepared on ITO substrate with different concentration of NaOH in 12 h: (a, b) 0.35 M NaOH; (c, d) 0.45 M NaOH; (e, f) 0.65 M NaOH

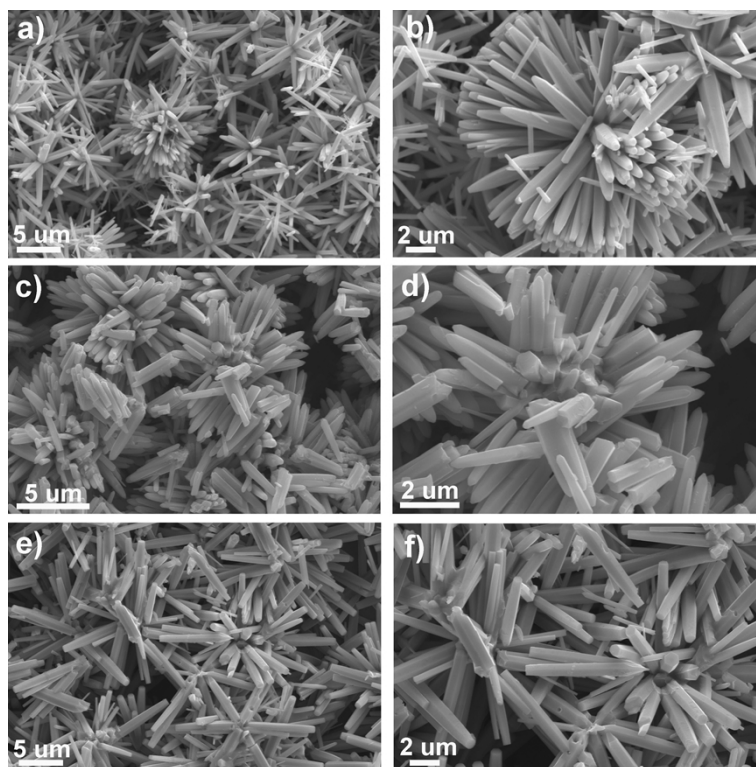

Fig. S2 Typical SEM images of ZnO prepared on ITO substrate with different concentration of NaOH in 24 h: (a, b) 0.35 M NaOH; (c, d) 0.45 M NaOH; (e, f) 0.65 M NaOH

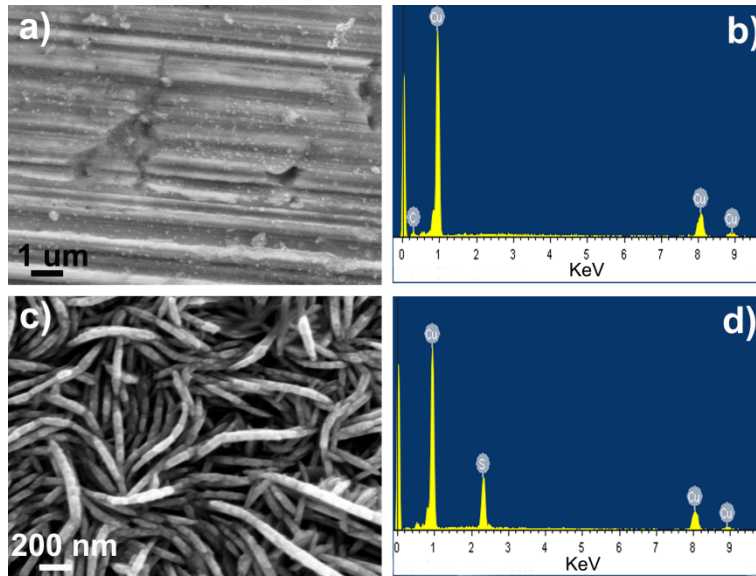

Fig. S3 (a) SEM image and (b)EDS spectrum of brass sheet, (c,) SEM images and (d)EDS spectrum of  $\text{Cu}_2\text{S}$  counter electrode.

Fig. S3a, S3c show the SEM images of brass sheet and  $\text{Cu}_2\text{S}$  counter electrode, respectively. EDS spectra of (b) brass sheet,, (d) 12h  $\text{ZnO}/8\text{CdS}$ , and (f)  $\text{Cu}_2\text{S}$  counter electrode. Fig. S3a shows a rough surface of brass sheet. EDS spectrum of brass sheet is shown in Fig. 5b, which include carbon, and cuprum chemical components. Compare with Fig. S3a, there are many uniform worm-like  $\text{Cu}_2\text{S}$  morphology based on brass sheet substrate shown in Fig. S3c. EDS spectrum of  $\text{Cu}_2\text{S}$  counter electrode is shown in Fig. S3d, which includes carbon, sulfur, and cuprum chemical components. The presence of sulfur and cuprum element in Fig. S3d indirectly indicates that formation of  $\text{Cu}_2\text{S}$  counter electrode.

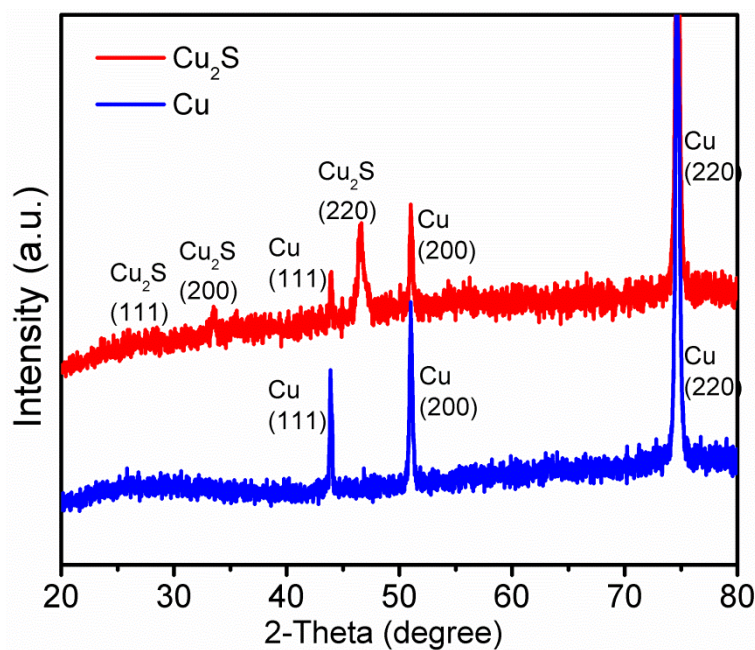

Fig. S4 XRD patterns of brass sheet and  $\text{Cu}_2\text{S}$  counter electrode.

To confirm the structure of the  $\text{Cu}_2\text{S}$  counter electrode, the XRD patterns are represented in Fig. S4. The diffraction pattern of brass sheet is fitted well with the bulk cubic crystal system Cu single phase. Three obvious diffraction peaks located at  $43.8^\circ$ ,  $51^\circ$ , and  $74.6^\circ$ , can be observed in all patterns of the brass sheet, which well agrees with Cu structure (111), (200), and (220) plane, respectively (JCPDS No.65-9743). Compared with the XRD patterns of the brass sheet, the diffraction patterns of  $\text{Cu}_2\text{S}$  counter electrode shown in Fig. S4 are also fitted well with the bulk cubic  $\text{Cu}_2\text{S}$  single phase. Three obvious diffraction peaks located at  $27.8^\circ$ ,  $32.5^\circ$ , and  $46.5^\circ$ , which well agrees with cubic  $\text{Cu}_2\text{S}$  structure (111), (200), and (220) plane, respectively (JCPDS No.253-0522). The X-ray diffraction results shown in Fig. S4 is well agrees with the EDS spectra shown in Fig. S3.

From Fig S5 and Fig S6, we can see that the Nyquist impedance plots (red) of 8CdS/ZnO and 3CdSe-8CdS/ZnO QDSCs are nearly coincident with the fitted curve (green). In Fig 7,  $R_s$  is the series resistance, which is related to the intercept of horizontal axis.  $R_{\text{CE}}$  is the charge-transfer resistance at the counter electrode-electrolyte interface, which is fitted from the left semicircle in Fig 7.  $R_{\text{rec-ZnO}}$  is the recombination resistance at the photoanode-electrolyte interface, which is fitted from the right semicircle

in Fig 7.

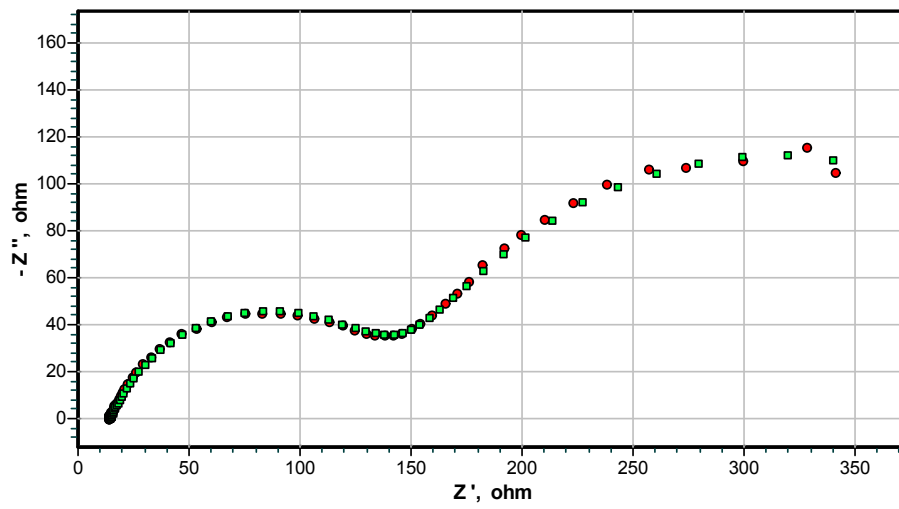

Fig. S5 Nyquist impedance plots (red) and fitted curve (green) under one-sun irradiation of 8CdS/ZnO QDSCs.

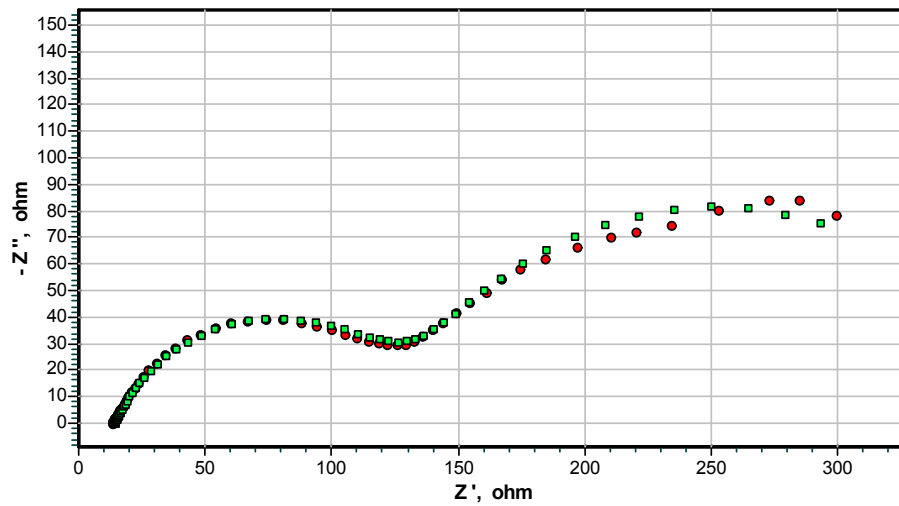

Fig. S6 Nyquist impedance plots (red) and fitted curve (green) under one-sun irradiation of 3CdSe-8CdS/ZnO QDSCs.
